# Supplementary material
Source: PubMed Central journal article supplement (PMC7336364)
Supplement: NIHMS1583042-supplement-Supp_Material_Tan_et_al_.pdf [file NIHMS1583042-supplement-Supp_Material_Tan_et_al_.pdf]

## Supplemental Material

| <i>Lmna</i> DCM Treatment      | Age (weeks) | n | LVDD (mm)      | P     | LVWT (mm)      | P    | EF (%)          | P     | FS (%)          | P     |
|--------------------------------|-------------|---|----------------|-------|----------------|------|-----------------|-------|-----------------|-------|
| <i>EGFP</i> -Ctrl <i>shRNA</i> | 5.5         | 5 | 4.41<br>± 0.11 |       | 0.49<br>± 0.09 |      | 13.91<br>± 2.50 |       | 6.16<br>± 1.15  |       |
| <i>Yy1</i> -Ctrl <i>shRNA</i>  |             | 5 | 4.16<br>± 0.12 | 0.009 | 0.56<br>± 0.09 | 0.25 | 31.70<br>± 4.31 | 4E-05 | 14.81<br>± 2.20 | 5E-05 |
| <i>Yy1-Ccnd1 shRNA</i>         |             | 5 | 4.04<br>± 0.15 | 0.002 | 0.58<br>± 0.06 | 0.09 | 32.06<br>± 2.88 | 5E-06 | 14.93<br>± 1.47 | 5E-06 |

### Online Table I. Effect of *Yy1-Ccnd1 shRNA* on *Lmna* DCM in mice

Effect of *Yy1-Ccnd1 shRNA*, *Yy1*-Ctrl *shRNA* or *EGFP*-Ctrl *shRNA* at a dose of 0.5E+13 vg/kg on *Lmna* DCM mice assessed at 5.5 weeks. P values represent comparisons to *Lmna* DCM mice treated with *EGFP*-Ctrl *shRNA*. LVDD, left ventricular diastolic dimension; LVWT, LV wall thickness; EF, ejection fraction; FS, fractional shortening.

| <i>Lmna</i> DCM Treatment | Age (weeks) | n | LVDD (mm)      | P    | LVWT (mm)      | P    | EF (%)          | P    | FS (%)         | P    |
|---------------------------|-------------|---|----------------|------|----------------|------|-----------------|------|----------------|------|
| <i>EGFP</i>               | 5.5         | 5 | 4.39<br>± 0.10 |      | 0.46<br>± 0.05 |      | 14.77<br>± 5.30 |      | 6.48<br>± 2.33 |      |
| <i>Ccnd1</i>              |             | 5 | 4.44<br>± 0.11 | 0.44 | 0.52<br>± 0.06 | 0.16 | 16.86<br>± 1.84 | 0.43 | 7.54<br>± 0.87 | 0.37 |

### Online Table II. Effect of *Ccnd1* on *Lmna* DCM in mice

Effect of *Ccnd1* or *EGFP* at a dose of 0.5E+13 vg/kg on *Lmna* DCM mice assessed at 5.5 weeks. P values represent comparisons to *Lmna* DCM mice treated with *EGFP*. LVDD, left ventricular diastolic dimension; LVWT, LV wall thickness; EF, ejection fraction; FS, fractional shortening.

| <i>Lmna</i> DCM Treatment | Age (weeks) | n | LVDD (mm)      | P    | LVWT (mm)      | P    | EF (%)          | P    | FS (%)         | P    |
|---------------------------|-------------|---|----------------|------|----------------|------|-----------------|------|----------------|------|
| <i>EGFP</i>               | 5.5         | 5 | 4.25<br>± 0.10 |      | 0.43<br>± 0.11 |      | 14.38<br>± 5.03 |      | 6.38<br>± 2.32 |      |
| <i>Bmp7</i>               |             | 6 | 4.02<br>± 0.22 | 0.07 | 0.45<br>± 0.09 | 0.79 | 20.56<br>± 8.94 | 0.21 | 9.31<br>± 4.21 | 0.20 |

### Online Table III. Effect of *Bmp7* on *Lmna* DCM in mice

Effect of *Bmp7* at a dose of 0.5E+13 vg/kg on *Lmna* DCM mice assessed at 5.5 weeks. P values represent comparisons to *Lmna* DCM mice treated with *EGFP*. LVDD, left ventricular diastolic dimension; LVWT, LV wall thickness; EF, ejection fraction; FS, fractional shortening.

| <i>Lmna</i> DCM Treatment | Age (weeks) | n | LVDD (mm)      | P    | LVWT (mm)      | P    | EF (%)          | P    | FS (%)          | P    |
|---------------------------|-------------|---|----------------|------|----------------|------|-----------------|------|-----------------|------|
| Ctrl <i>shRNA</i>         | 5.5         | 6 | 4.28<br>± 0.12 |      | 0.47<br>± 0.08 |      | 17.34<br>± 9.80 |      | 7.86<br>± 4.76  |      |
| <i>Ctgf shRNA</i>         |             | 7 | 4.16<br>± 0.13 | 0.10 | 0.51<br>± 0.06 | 0.26 | 23.79<br>± 4.52 | 0.15 | 10.83<br>± 2.20 | 0.17 |

18 **OnlineTable IV. Effect of *Ctgf* shRNA on *Lmna* DCM in mice**  
19 Effect of *Ctgf* shRNA at a dose of 2.0E+13 vg/kg on *Lmna* DCM mice assessed at 5.5 weeks. P values represent  
20 comparisons to *Lmna* DCM mice treated with Ctrl shRNA. LVDD, left ventricular diastolic dimension; LVWT,  
21 LV wall thickness; EF, ejection fraction; FS, fractional shortening.  
22

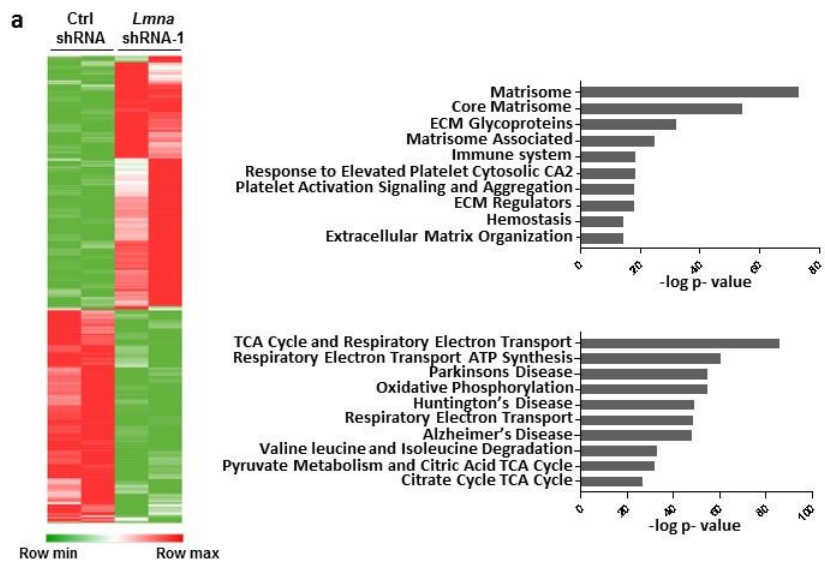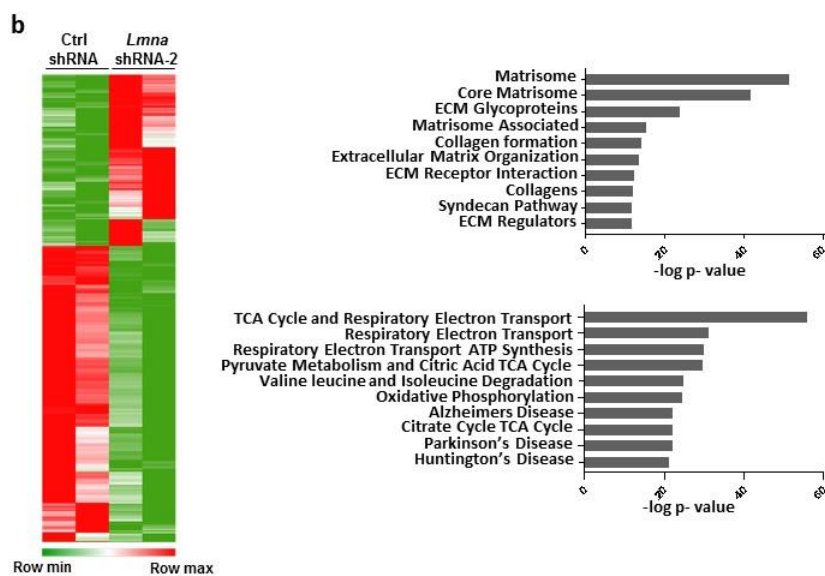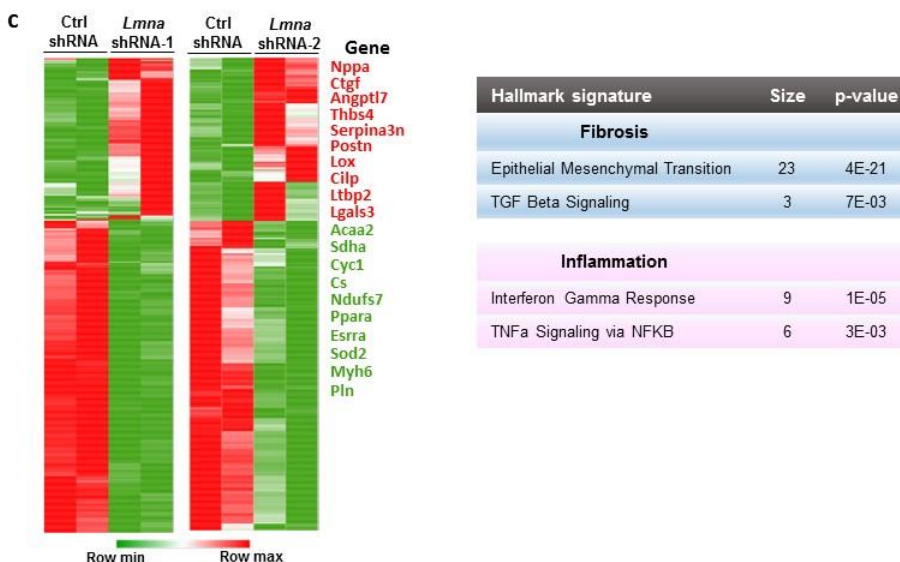

Online Figure 1

24 **Online Figure I. *Lmna* shRNAs result in dysregulated downstream signaling pathways**  
25 **(a, b, c)** Heat map representing color-coded expression level of genes that significantly changed in *Lmna*  
26 shRNA-1 **(a)** or *Lmna* shRNA-2 **(b)** transduced group or common dysregulated genes for both groups **(c)** in  
27 comparison to control shRNA group or. Virus dose, 2.0E+13 vg/kg. Mice were harvest four weeks after  
28 transduction, n = 2. Top 10 gene sets in canonical pathway of each category **(a, b)** or representative hallmark  
29 signature **(c)** as designated by GSEA, arranged by -log P value.  
30

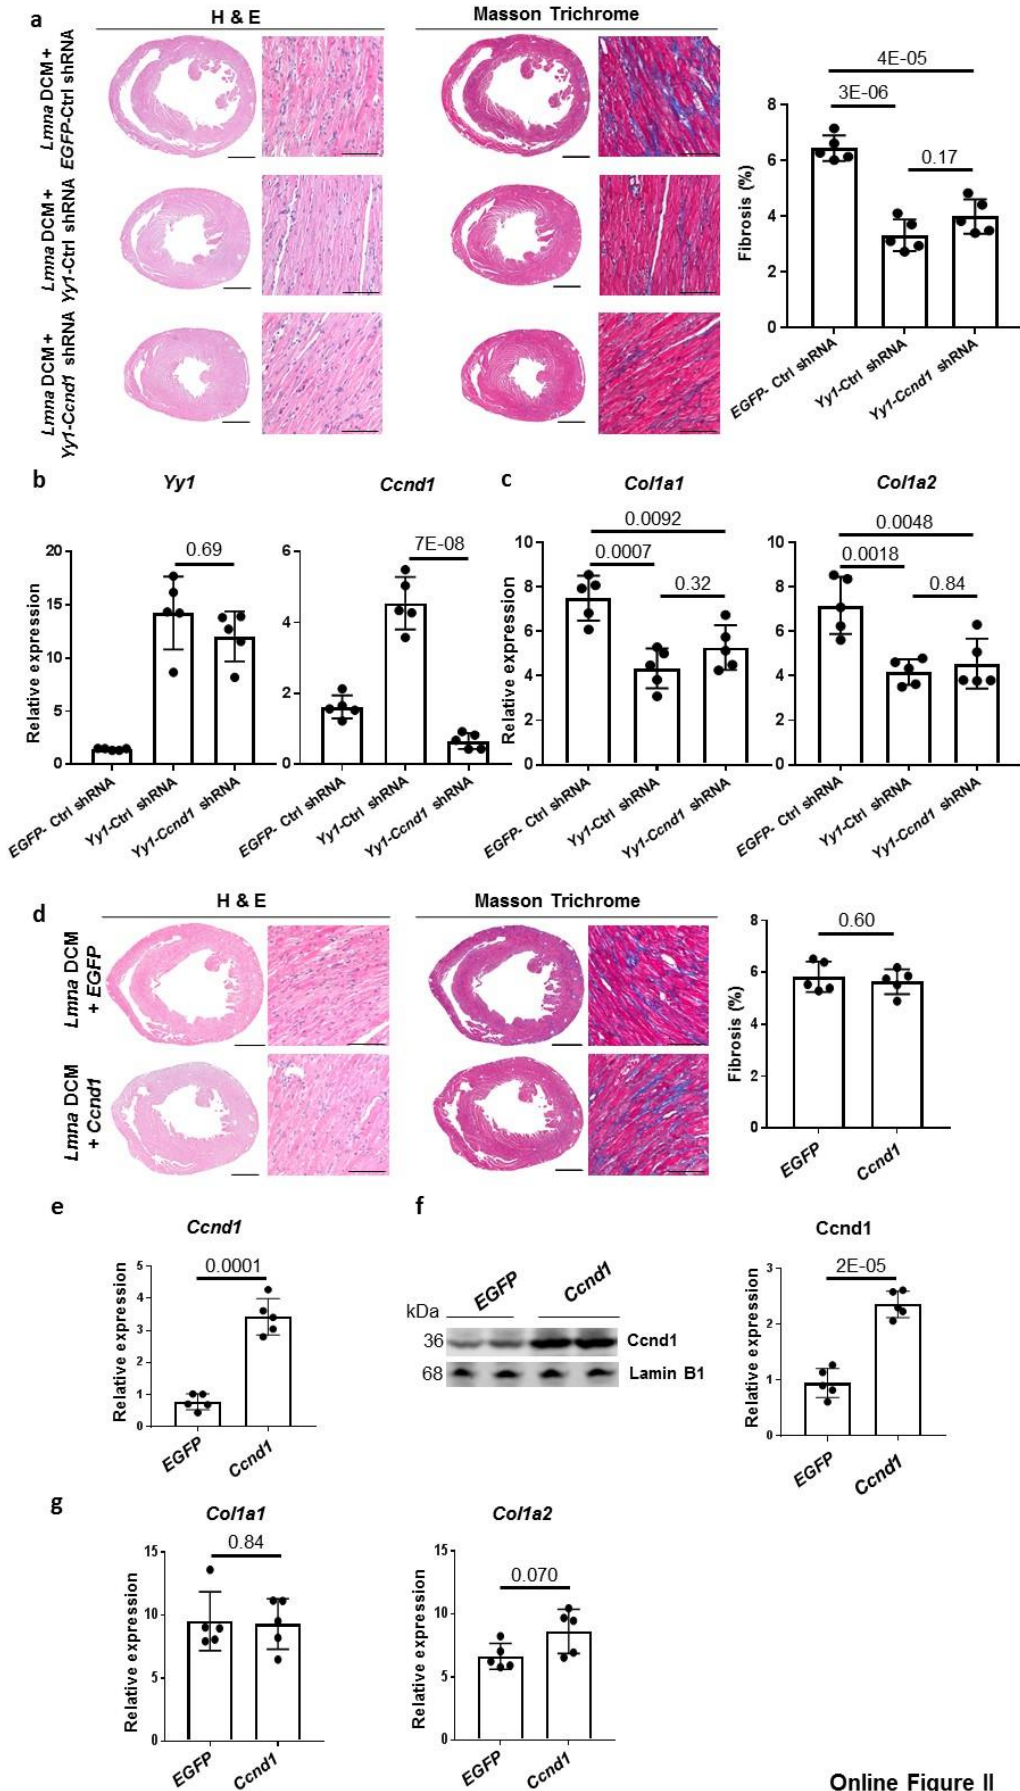

Online Figure II

33 **Online Figure II. Modulation of *Ccnd1* does not affect the suppressive effect of *Yy1* on *Lmna* DCM and**  
34 **cardiac fibrosis**

35 (a) H&E and MT staining of paraffin heart sections from *Lmna* DCM mice taken 4 weeks after *EGFP*-Ctrl  
36 shRNA, *Yy1*-Ctrl shRNA or *Yy1-Ccnd1* shRNA transduction. Quantification of myocardial fibrosis of MT  
37 sections is shown, n = 5. Scale bars: 1000  $\mu$ m for complete heart images; 100  $\mu$ m for enlarged images. (b)  
38 Quantitative real-time PCR analyses of *Yy1* and *Ccnd1* levels in cardiomyocytes (CM) from mice transduced  
39 with *EGFP*-Ctrl shRNA, *Yy1*-Ctrl shRNA or *Yy1-Ccnd1* shRNA, n = 5. (c) Quantitative real-time PCR analyses  
40 of *Colla1* and *Colla2* expression in *Lmna* DCM heart tissue from groups treated with *EGFP*-Ctrl shRNA, *Yy1*-  
41 Ctrl shRNA or *Yy1-Ccnd1* shRNA, n = 5. (d) H&E and MT stained paraffin heart sections of *Lmna* DCM mice  
42 treated with *EGFP* or *Ccnd1*. Quantification of myocardial fibrosis of MT sections is shown, n = 5. Scale bars:  
43 1000  $\mu$ m for complete heart images; 100  $\mu$ m for enlarged images. (e) Quantitative real-time PCR analyses of  
44 *Ccnd1* levels and (f) Western blot and quantitative analysis of *Ccnd1* protein levels in mouse heart tissue from  
45 *EGFP* and *Ccnd1* treated groups. Mouse hearts were harvested 4 weeks after transduction, n = 5. (g)  
46 Quantitative real-time PCR analyses of *Colla1* and *Colla2* in *Lmna* DCM heart tissue from mice treated with  
47 *EGFP* and *Yy1*, n = 5.  
48

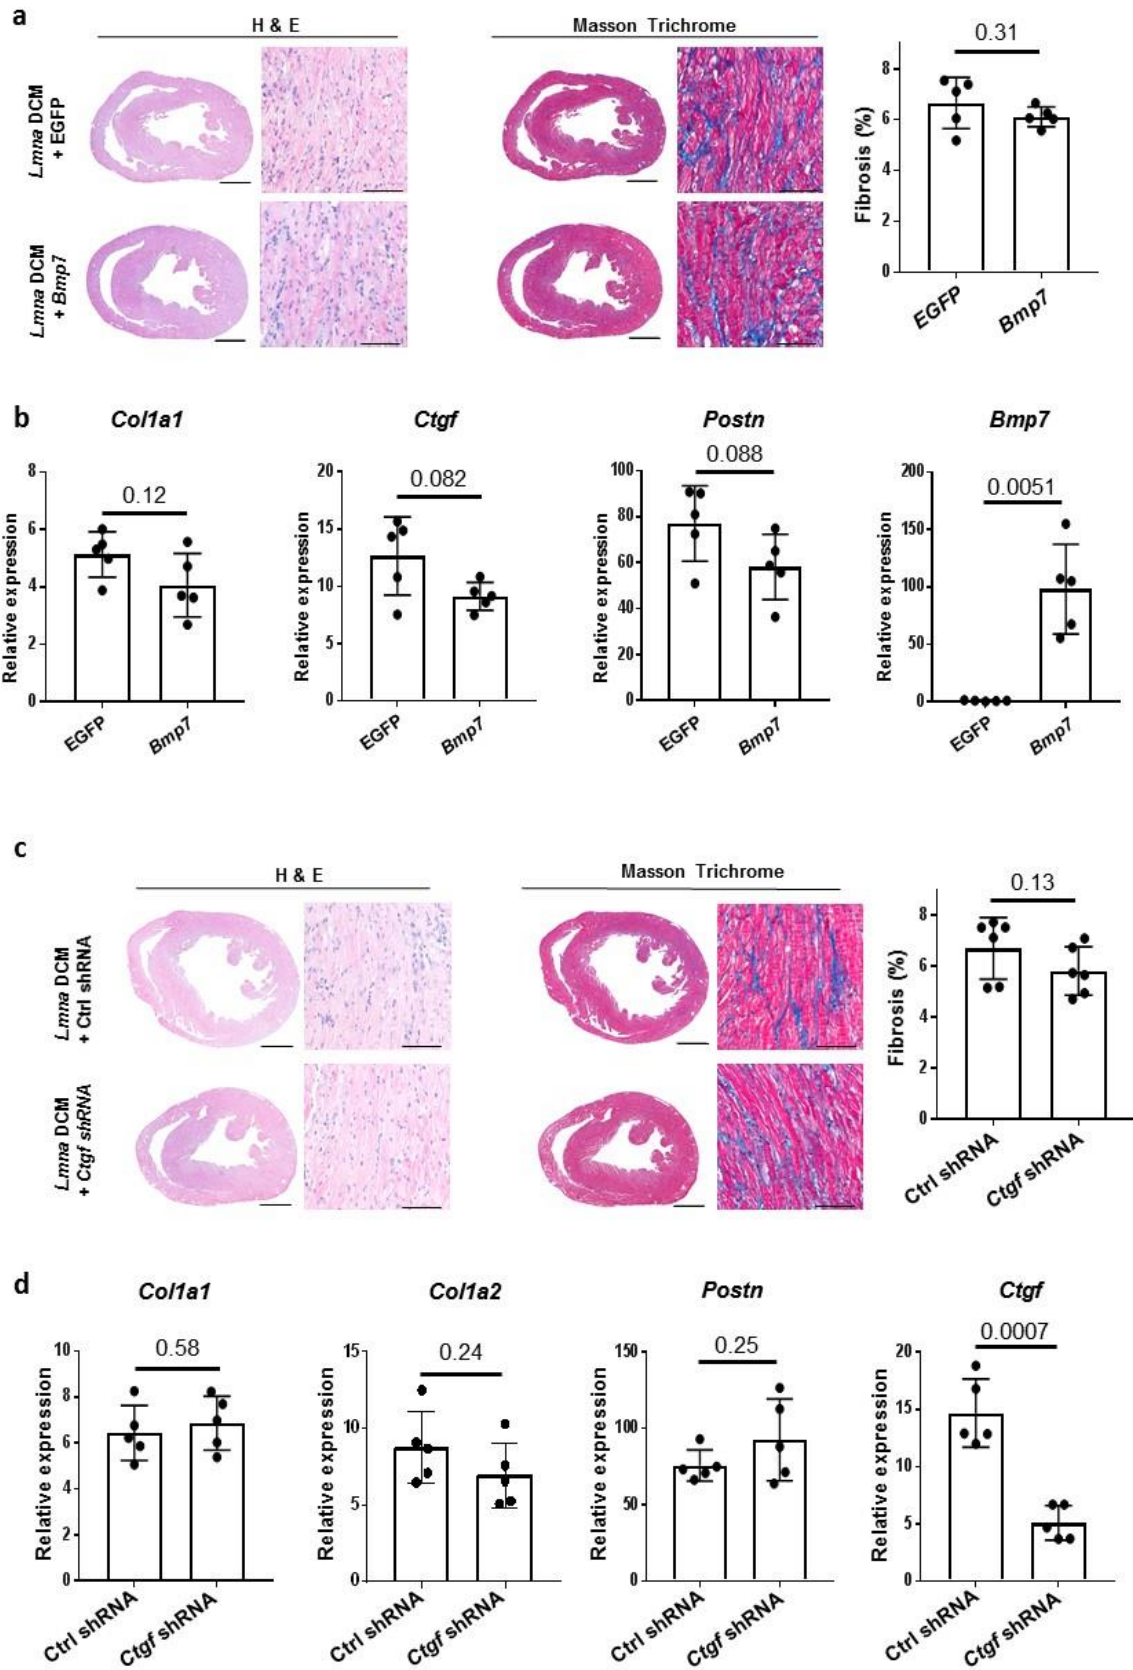

Online Figure III

50 **Online Figure III. Upregulation of *Bmp7* or *Ctgf* silencing alone is not sufficient to suppress *Lmna* DCM**  
51 **and cardiac fibrosis**  
52 (a and c) H&E and MT staining of paraffin heart sections from *Lmna* DCM mice 4 weeks after (a) *EGFP* or  
53 *Bmp7* transduction and (c) Ctrl shRNA or *Ctgf* shRNA transduction. Quantification of myocardial fibrosis of  
54 MT sections is shown,  $n \geq 5$ . Scale bars: 1000  $\mu\text{m}$  for complete heart images; 100  $\mu\text{m}$  for enlarged images. (b  
55 and d) Quantitative real-time PCR analyses of *Colla1*, *Colla2*, *Ctgf*, *Bmp7* and *Postn* expression in *Lmna*  
56 DCM groups treated with (a) *EGFP*, *Bmp7*,  $n = 5$  or (b) Ctrl shRNA, *Ctgf* shRNA,  $n = 5$ .



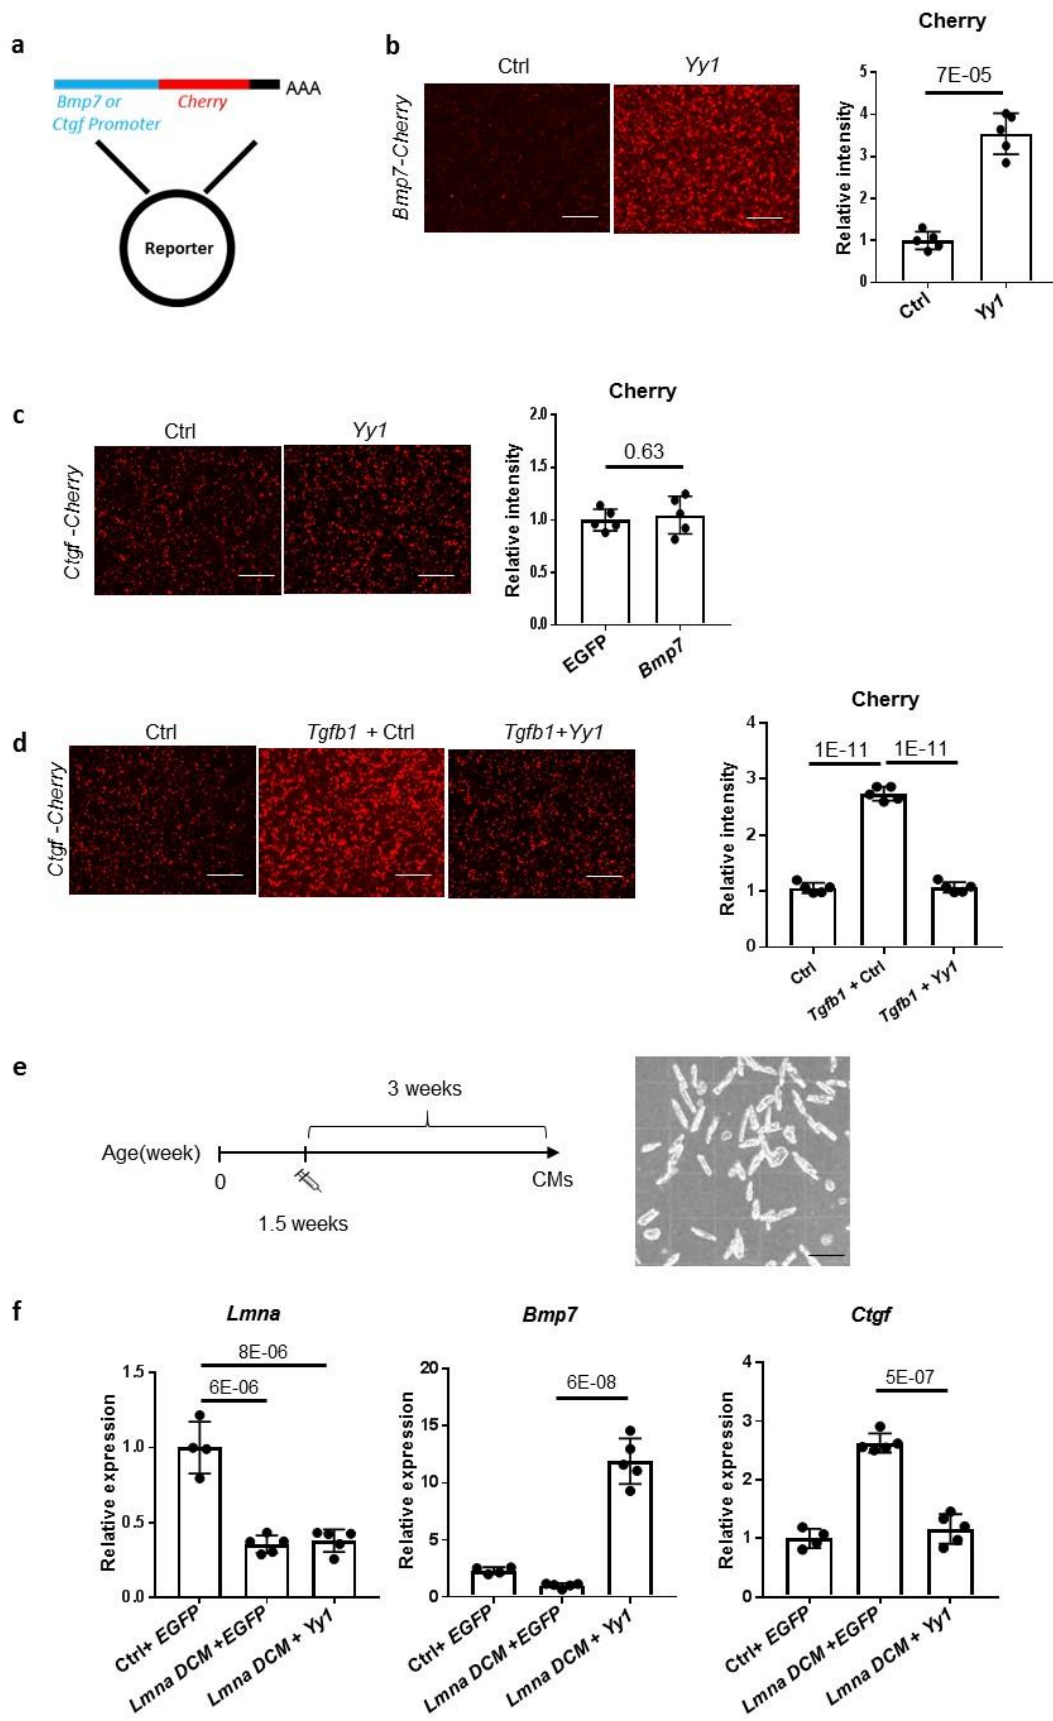

Online Figure IV

58 **Online Figure IV. Upregulation of *Yy1* regulates gene expression of *Bmp7* and *Ctgf***

59 (a) Schematic diagram of reporter plasmid with either a *Bmp7* or *Ctgf* promoter followed by a *Cherry* gene. (b,  
60 c and d) HEK293T cells co-transfected with (b) *Yy1* plasmid and *Bmp7-Cherry* reporter plasmid (Red), (c) *Yy1*  
61 plasmid and *Ctgf-Cherry* reporter plasmid and (d) *Tgfb1* plasmid + control, *Tgfb1* plasmid + *Yy1* plasmid and  
62 *Ctgf-Cherry* reporter plasmid. Scale bar = 1000  $\mu$ m. Graph on the right shows the relative intensity of *Cherry*  
63 expression (red) in respective groups, n = 5. (e) Experimental timeline showing timepoints of virus injection and  
64 CMs isolation. Brightfield image of isolated CMs is shown, scale bar = 200  $\mu$ m. (f) Quantitative real-time PCR  
65 analyses of *Lmna*, *Bmp7* and *Ctgf* expression in ctrl wildtype group treated with *EGFP* or *Lmna* DCM groups  
66 treated with *EGFP* or *Yy1*, n  $\geq$  4.  
67

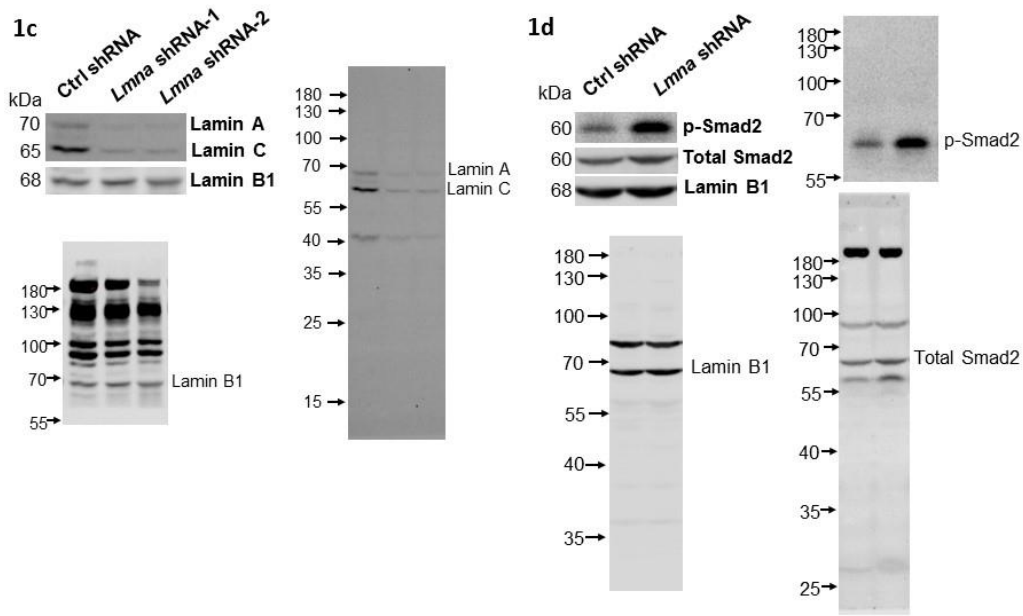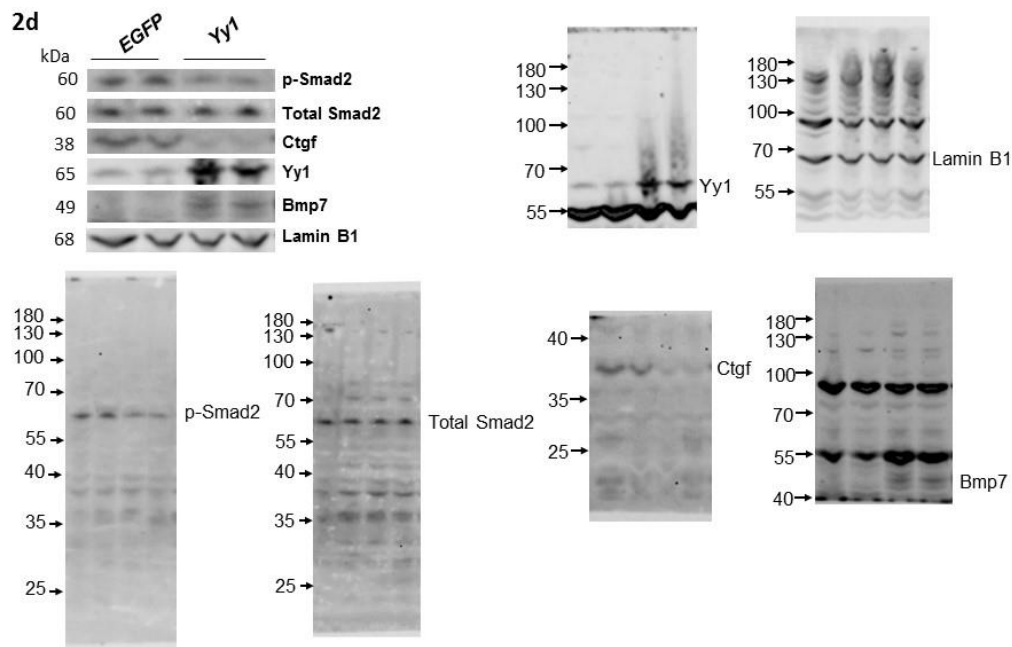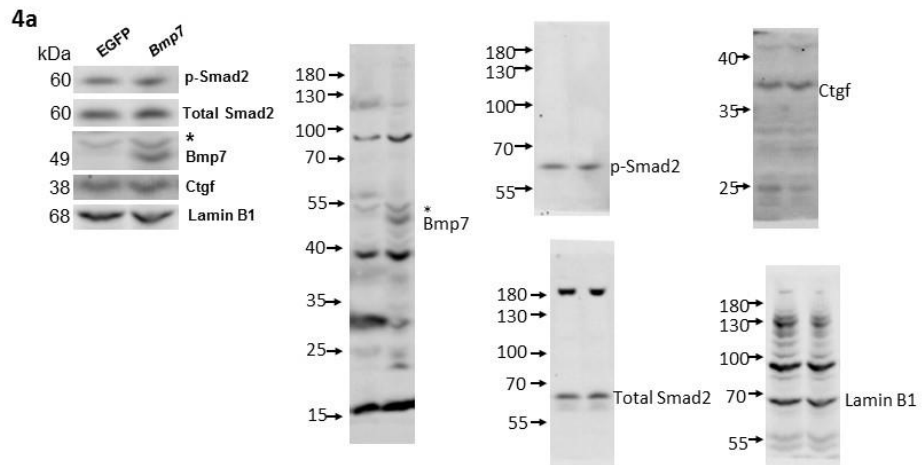

Online Figure V

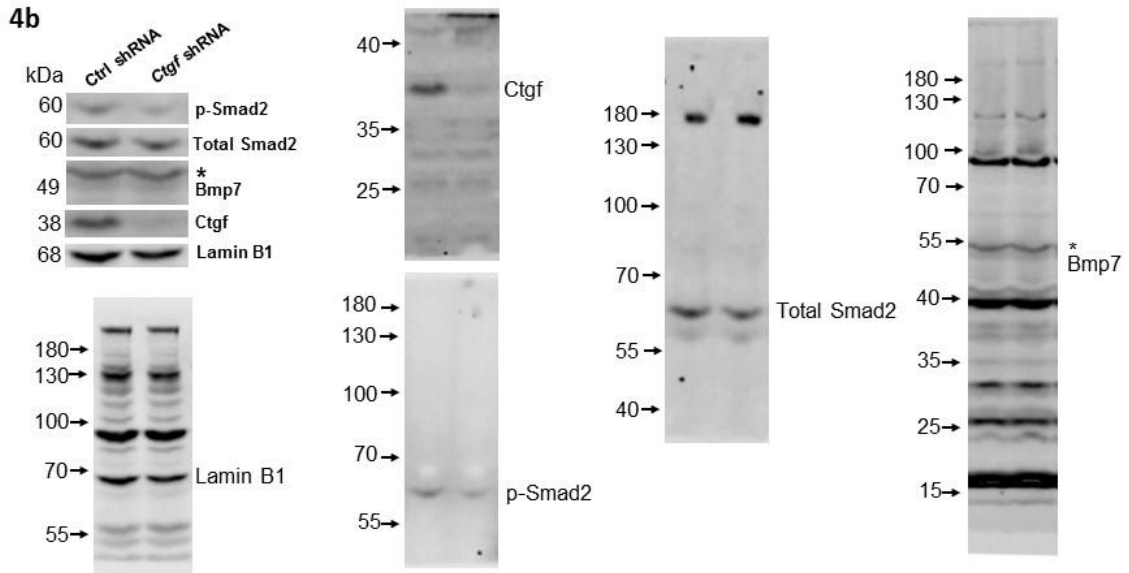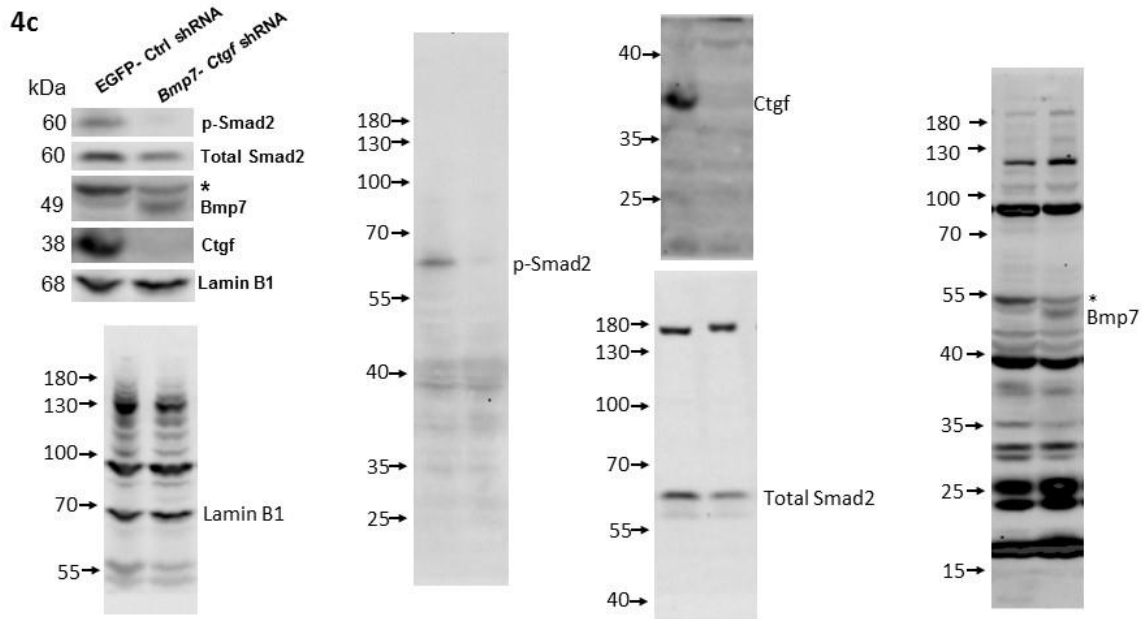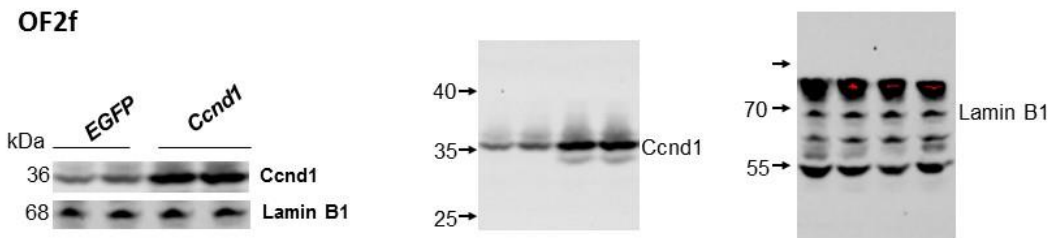

Online Figure VI

Online Figure V and VI. Immunoblots containing markers
