# Supplementary material
Source: PubMed Central journal article supplement (PMC7336364)
Supplement: NIHMS1583042-supplement-Supplemental_figures.pdf [file NIHMS1583042-supplement-Supplemental_figures.pdf]

1 **Supplemental Material**

| <i>Lmna</i> DCM Treatment      | Age (weeks) | n | LVDD (mm)   | P     | LVWT (mm)   | P    | EF (%)       | P     | FS (%)       | P     |
|--------------------------------|-------------|---|-------------|-------|-------------|------|--------------|-------|--------------|-------|
| <i>EGFP</i> -Ctrl <i>shRNA</i> | 5.5         | 5 | 4.41 ± 0.11 |       | 0.49 ± 0.09 |      | 13.91 ± 2.50 |       | 6.16 ± 1.15  |       |
| <i>Yy1</i> -Ctrl <i>shRNA</i>  |             | 5 | 4.16 ± 0.12 | 0.009 | 0.56 ± 0.09 | 0.25 | 31.70 ± 4.31 | 4E-05 | 14.81 ± 2.20 | 5E-05 |
| <i>Yy1-Ccnd1 shRNA</i>         |             | 5 | 4.04 ± 0.15 | 0.002 | 0.58 ± 0.06 | 0.09 | 32.06 ± 2.88 | 5E-06 | 14.93 ± 1.47 | 5E-06 |

2 **Online Table I. Effect of *Yy1-Ccnd1* shRNA on *Lmna* DCM in mice**

3 Effect of *Yy1-Ccnd1* shRNA, *Yy1*-Ctrl shRNA or *EGFP*-Ctrl shRNA at a dose of 0.5E+13 vg/kg on *Lmna* DCM mice assessed at 5.5 weeks. P values represent comparisons to *Lmna* DCM mice treated with *EGFP*-Ctrl shRNA. LVDD, left ventricular diastolic dimension; LVWT, LV wall thickness; EF, ejection fraction; FS, fractional shortening.

| <i>Lmna</i> DCM Treatment | Age (weeks) | n | LVDD (mm)   | P    | LVWT (mm)   | P    | EF (%)       | P    | FS (%)      | P    |
|---------------------------|-------------|---|-------------|------|-------------|------|--------------|------|-------------|------|
| <i>EGFP</i>               | 5.5         | 5 | 4.39 ± 0.10 |      | 0.46 ± 0.05 |      | 14.77 ± 5.30 |      | 6.48 ± 2.33 |      |
| <i>Ccnd1</i>              |             | 5 | 4.44 ± 0.11 | 0.44 | 0.52 ± 0.06 | 0.16 | 16.86 ± 1.84 | 0.43 | 7.54 ± 0.87 | 0.37 |

8 **Online Table II. Effect of *Ccnd1* on *Lmna* DCM in mice**

9 Effect of *Ccnd1* or *EGFP* at a dose of 0.5E+13 vg/kg on *Lmna* DCM mice assessed at 5.5 weeks. P values represent comparisons to *Lmna* DCM mice treated with *EGFP*. LVDD, left ventricular diastolic dimension; LVWT, LV wall thickness; EF, ejection fraction; FS, fractional shortening.

| <i>Lmna</i> DCM Treatment | Age (weeks) | n | LVDD (mm)   | P    | LVWT (mm)   | P    | EF (%)       | P    | FS (%)      | P    |
|---------------------------|-------------|---|-------------|------|-------------|------|--------------|------|-------------|------|
| <i>EGFP</i>               | 5.5         | 5 | 4.25 ± 0.10 |      | 0.43 ± 0.11 |      | 14.38 ± 5.03 |      | 6.38 ± 2.32 |      |
| <i>Bmp7</i>               |             | 6 | 4.02 ± 0.22 | 0.07 | 0.45 ± 0.09 | 0.79 | 20.56 ± 8.94 | 0.21 | 9.31 ± 4.21 | 0.20 |

13 **Online Table III. Effect of *Bmp7* on *Lmna* DCM in mice**

14 Effect of *Bmp7* at a dose of 0.5E+13 vg/kg on *Lmna* DCM mice assessed at 5.5 weeks. P values represent comparisons to *Lmna* DCM mice treated with *EGFP*. LVDD, left ventricular diastolic dimension; LVWT, LV wall thickness; EF, ejection fraction; FS, fractional shortening.

| <i>Lmna</i> DCM Treatment | Age (weeks) | n | LVDD (mm)   | P    | LVWT (mm)   | P    | EF (%)       | P    | FS (%)       | P    |
|---------------------------|-------------|---|-------------|------|-------------|------|--------------|------|--------------|------|
| Ctrl shRNA                | 5.5         | 6 | 4.28 ± 0.12 |      | 0.47 ± 0.08 |      | 17.34 ± 9.80 |      | 7.86 ± 4.76  |      |
| <i>Ctgf</i> shRNA         |             | 7 | 4.16 ± 0.13 | 0.10 | 0.51 ± 0.06 | 0.26 | 23.79 ± 4.52 | 0.15 | 10.83 ± 2.20 | 0.17 |

18 **Online Table IV. Effect of *Ctgf* shRNA on *Lmna* DCM in mice**

19 Effect of *Ctgf* shRNA at a dose of 2.0E+13 vg/kg on *Lmna* DCM mice assessed at 5.5 weeks. P values represent comparisons to *Lmna* DCM mice treated with Ctrl shRNA. LVDD, left ventricular diastolic dimension; LVWT, LV wall thickness; EF, ejection fraction; FS, fractional shortening.
